# Supplementary material for: Investigating Host and Parasitic Plant Interaction by Tissue-Specific Gene Analyses on Tomato and Cuscuta campestris Interface at Three Haustorial Developmental Stages
Source: Front Plant Sci. 2022 Feb 10;12:764843. doi: 10.3389/fpls.2021.764843 (PMC8866705; doi:10.3389/fpls.2021.764843)
Supplement: Supplementary file 16 [file Table_9.XLSX]

## Sheet: 工作表1
Supplemental Table S9. The GO enrichment results and statistics of SOM3, 8 GCN target modules from tomato host tissue LCM RNA-Seq data.
SOM3 module 3
Annotation Version and Release Date:	GO Ontology database DOI: 10.5281/zenodo.5080993 Released 2021-07-02
Analyzed List:	SOM3 module 3
Reference List:	Solanum lycopersicum (all genes in database)
Test Type:	FISHER
Correction:	FDR
GO biological process complete	background frequency (Total: 34647)	sample frequency (Total: 204)	expected value	over/underrepresentation	fold enrichment	raw P-value	FDR
asparagine biosynthetic process (GO:0006529)	2	1	0.01	+	84.92	0.0175	1
response to karrikin (GO:0080167)	4	1	0.02	+	42.46	0.0289	1
glucosamine-containing compound catabolic process (GO:1901072)	4	1	0.02	+	42.46	0.0289	1
chitin catabolic process (GO:0006032)	4	1	0.02	+	42.46	0.0289	1
chitin metabolic process (GO:0006030)	4	1	0.02	+	42.46	0.0289	1
aminoglycan catabolic process (GO:0006026)	4	1	0.02	+	42.46	0.0289	1
meiotic mismatch repair (GO:0000710)	4	1	0.02	+	42.46	0.0289	1
amino sugar catabolic process (GO:0046348)	4	1	0.02	+	42.46	0.0289	1
aminoglycan metabolic process (GO:0006022)	9	2	0.05	+	37.74	0.00181	1
asparagine metabolic process (GO:0006528)	5	1	0.03	+	33.97	0.0346	1
trichome differentiation (GO:0010026)	5	1	0.03	+	33.97	0.0346	1
mitochondrial fission (GO:0000266)	5	1	0.03	+	33.97	0.0346	1
glycosaminoglycan metabolic process (GO:0030203)	5	1	0.03	+	33.97	0.0346	1
glycosaminoglycan biosynthetic process (GO:0006024)	5	1	0.03	+	33.97	0.0346	1
aminoglycan biosynthetic process (GO:0006023)	5	1	0.03	+	33.97	0.0346	1
sesquiterpene biosynthetic process (GO:0051762)	6	1	0.04	+	28.31	0.0403	1
sesquiterpene metabolic process (GO:0051761)	6	1	0.04	+	28.31	0.0403	1
cell junction organization (GO:0034330)	7	1	0.04	+	24.26	0.0459	1
cell junction assembly (GO:0034329)	7	1	0.04	+	24.26	0.0459	1
cell wall modification (GO:0042545)	7	1	0.04	+	24.26	0.0459	1
cellular response to reactive nitrogen species (GO:1902170)	7	1	0.04	+	24.26	0.0459	1
cold acclimation (GO:0009631)	7	1	0.04	+	24.26	0.0459	1
cellular response to nitrate (GO:0071249)	7	1	0.04	+	24.26	0.0459	1
cell-cell junction assembly (GO:0007043)	7	1	0.04	+	24.26	0.0459	1
cell-cell junction organization (GO:0045216)	7	1	0.04	+	24.26	0.0459	1
glucosamine-containing compound metabolic process (GO:1901071)	8	1	0.05	+	21.23	0.0515	1
peroxisome fission (GO:0016559)	8	1	0.05	+	21.23	0.0515	1
UDP-L-arabinose metabolic process (GO:0033356)	8	1	0.05	+	21.23	0.0515	1
gibberellic acid mediated signaling pathway (GO:0009740)	9	1	0.05	+	18.87	0.057	1
cellular response to gibberellin stimulus (GO:0071370)	9	1	0.05	+	18.87	0.057	1
cellular response to nitrogen compound (GO:1901699)	9	1	0.05	+	18.87	0.057	1
gibberellin mediated signaling pathway (GO:0010476)	9	1	0.05	+	18.87	0.057	1
cutin biosynthetic process (GO:0010143)	10	1	0.06	+	16.98	0.0625	1
resolution of meiotic recombination intermediates (GO:0000712)	10	1	0.06	+	16.98	0.0625	1
cellular response to inorganic substance (GO:0071241)	11	1	0.06	+	15.44	0.068	1
meiotic chromosome separation (GO:0051307)	11	1	0.06	+	15.44	0.068	1
cytokinin-activated signaling pathway (GO:0009736)	12	1	0.07	+	14.15	0.0735	1
cellular response to cytokinin stimulus (GO:0071368)	12	1	0.07	+	14.15	0.0735	1
regulation of phosphorylation of RNA polymerase II C-terminal domain (GO:1901407)	12	1	0.07	+	14.15	0.0735	1
response to cold (GO:0009409)	12	1	0.07	+	14.15	0.0735	1
chromosome separation (GO:0051304)	12	1	0.07	+	14.15	0.0735	1
vesicle cytoskeletal trafficking (GO:0099518)	13	1	0.08	+	13.06	0.0789	1
actin filament-based transport (GO:0099515)	13	1	0.08	+	13.06	0.0789	1
vesicle transport along actin filament (GO:0030050)	13	1	0.08	+	13.06	0.0789	1
actin filament-based movement (GO:0030048)	13	1	0.08	+	13.06	0.0789	1
terpene biosynthetic process (GO:0046246)	14	1	0.08	+	12.13	0.0843	1
nitrate transport (GO:0015706)	14	1	0.08	+	12.13	0.0843	1
response to nitrate (GO:0010167)	14	1	0.08	+	12.13	0.0843	1
hydrocarbon biosynthetic process (GO:0120251)	14	1	0.08	+	12.13	0.0843	1
COPII-coated vesicle budding (GO:0090114)	16	1	0.09	+	10.61	0.095	1
cytoskeleton-dependent intracellular transport (GO:0030705)	16	1	0.09	+	10.61	0.095	1
autophagy of mitochondrion (GO:0000422)	17	1	0.1	+	9.99	0.1	1
establishment of vesicle localization (GO:0051650)	17	1	0.1	+	9.99	0.1	1
vesicle localization (GO:0051648)	17	1	0.1	+	9.99	0.1	1
amino sugar metabolic process (GO:0006040)	17	1	0.1	+	9.99	0.1	1
mitochondrion disassembly (GO:0061726)	17	1	0.1	+	9.99	0.1	1
mismatch repair (GO:0006298)	18	1	0.11	+	9.44	0.106	1
aspartate family amino acid biosynthetic process (GO:0009067)	19	1	0.11	+	8.94	0.111	1
cell surface receptor signaling pathway (GO:0007166)	19	1	0.11	+	8.94	0.111	1
meiotic chromosome segregation (GO:0045132)	22	1	0.13	+	7.72	0.126	1
response to gibberellin (GO:0009739)	22	1	0.13	+	7.72	0.126	1
plant epidermis development (GO:0090558)	23	1	0.14	+	7.38	0.131	1
sterol biosynthetic process (GO:0016126)	24	1	0.14	+	7.08	0.137	1
movement of cell or subcellular component (GO:0006928)	24	1	0.14	+	7.08	0.137	1
terpene metabolic process (GO:0042214)	24	1	0.14	+	7.08	0.137	1
negative regulation of mitotic nuclear division (GO:0045839)	25	1	0.15	+	6.79	0.142	1
negative regulation of nuclear division (GO:0051784)	26	1	0.15	+	6.53	0.147	1
hydrocarbon metabolic process (GO:0120252)	26	1	0.15	+	6.53	0.147	1
chloroplast organization (GO:0009658)	79	3	0.47	+	6.45	0.0125	1
exocytosis (GO:0006887)	54	2	0.32	+	6.29	0.0427	1
organelle disassembly (GO:1903008)	28	1	0.16	+	6.07	0.157	1
peroxisome organization (GO:0007031)	28	1	0.16	+	6.07	0.157	1
response to water (GO:0009415)	29	1	0.17	+	5.86	0.162	1
response to water deprivation (GO:0009414)	29	1	0.17	+	5.86	0.162	1
carbohydrate derivative catabolic process (GO:1901136)	30	1	0.18	+	5.66	0.166	1
inorganic anion transport (GO:0015698)	30	1	0.18	+	5.66	0.166	1
tissue development (GO:0009888)	30	1	0.18	+	5.66	0.166	1
secretion (GO:0046903)	61	2	0.36	+	5.57	0.0528	1
export from cell (GO:0140352)	61	2	0.36	+	5.57	0.0528	1
secretion by cell (GO:0032940)	61	2	0.36	+	5.57	0.0528	1
aspartate family amino acid metabolic process (GO:0009066)	31	1	0.18	+	5.48	0.171	1
response to acid chemical (GO:0001101)	31	1	0.18	+	5.48	0.171	1
nucleotide-sugar metabolic process (GO:0009225)	31	1	0.18	+	5.48	0.171	1
plastid organization (GO:0009657)	94	3	0.55	+	5.42	0.0195	1
reciprocal homologous recombination (GO:0140527)	32	1	0.19	+	5.31	0.176	1
homologous recombination (GO:0035825)	32	1	0.19	+	5.31	0.176	1
reciprocal meiotic recombination (GO:0007131)	32	1	0.19	+	5.31	0.176	1
regulation of mitotic nuclear division (GO:0007088)	33	1	0.19	+	5.15	0.181	1
regulation of nuclear division (GO:0051783)	34	1	0.2	+	5	0.186	1
potassium ion transport (GO:0006813)	36	1	0.21	+	4.72	0.195	1
negative regulation of organelle organization (GO:0010639)	36	1	0.21	+	4.72	0.195	1
meiosis I (GO:0007127)	37	1	0.22	+	4.59	0.2	1
response to hormone (GO:0009725)	198	5	1.17	+	4.29	0.00703	1
cellular response to oxygen-containing compound (GO:1901701)	80	2	0.47	+	4.25	0.0836	1
response to endogenous stimulus (GO:0009719)	200	5	1.18	+	4.25	0.00732	1
response to inorganic substance (GO:0010035)	82	2	0.48	+	4.14	0.0871	1
regulation of pH (GO:0006885)	42	1	0.25	+	4.04	0.223	1
meiotic nuclear division (GO:0140013)	43	1	0.25	+	3.95	0.228	1
vesicle budding from membrane (GO:0006900)	43	1	0.25	+	3.95	0.228	1
meiosis I cell cycle process (GO:0061982)	43	1	0.25	+	3.95	0.228	1
autophagy (GO:0006914)	44	1	0.26	+	3.86	0.232	1
process utilizing autophagic mechanism (GO:0061919)	44	1	0.26	+	3.86	0.232	1
negative regulation of mitotic cell cycle (GO:0045930)	44	1	0.26	+	3.86	0.232	1
cell wall organization (GO:0071555)	44	1	0.26	+	3.86	0.232	1
monovalent inorganic cation homeostasis (GO:0055067)	44	1	0.26	+	3.86	0.232	1
response to cytokinin (GO:0009735)	46	1	0.27	+	3.69	0.241	1
steroid biosynthetic process (GO:0006694)	46	1	0.27	+	3.69	0.241	1
external encapsulating structure organization (GO:0045229)	48	1	0.28	+	3.54	0.25	1
cellular response to lipid (GO:0071396)	51	1	0.3	+	3.33	0.263	1
response to auxin (GO:0009733)	52	1	0.31	+	3.27	0.268	1
organelle fission (GO:0048285)	105	2	0.62	+	3.24	0.13	1
negative regulation of cell cycle process (GO:0010948)	54	1	0.32	+	3.15	0.276	1
import into nucleus (GO:0051170)	54	1	0.32	+	3.15	0.276	1
protein import into nucleus (GO:0006606)	54	1	0.32	+	3.15	0.276	1
response to lipid (GO:0033993)	108	2	0.64	+	3.15	0.136	1
DNA recombination (GO:0006310)	111	2	0.65	+	3.06	0.142	1
negative regulation of cell cycle (GO:0045786)	56	1	0.33	+	3.03	0.285	1
negative regulation of cellular component organization (GO:0051129)	56	1	0.33	+	3.03	0.285	1
actin filament organization (GO:0007015)	56	1	0.33	+	3.03	0.285	1
protein localization to nucleus (GO:0034504)	57	1	0.34	+	2.98	0.289	1
response to temperature stimulus (GO:0009266)	57	1	0.34	+	2.98	0.289	1
meiotic cell cycle process (GO:1903046)	58	1	0.34	+	2.93	0.293	1
response to organic substance (GO:0010033)	299	5	1.76	+	2.84	0.0338	1
anion transport (GO:0006820)	60	1	0.35	+	2.83	0.301	1
nuclear chromosome segregation (GO:0098813)	60	1	0.35	+	2.83	0.301	1
establishment of organelle localization (GO:0051656)	61	1	0.36	+	2.78	0.305	1
regulation of mitotic cell cycle (GO:0007346)	61	1	0.36	+	2.78	0.305	1
actin cytoskeleton organization (GO:0030036)	61	1	0.36	+	2.78	0.305	1
cell differentiation (GO:0030154)	64	1	0.38	+	2.65	0.317	1
sterol metabolic process (GO:0016125)	66	1	0.39	+	2.57	0.325	1
cellular developmental process (GO:0048869)	66	1	0.39	+	2.57	0.325	1
regulation of protein phosphorylation (GO:0001932)	67	1	0.39	+	2.53	0.329	1
cellular component disassembly (GO:0022411)	67	1	0.39	+	2.53	0.329	1
actin filament-based process (GO:0030029)	68	1	0.4	+	2.5	0.333	1
meiotic cell cycle (GO:0051321)	68	1	0.4	+	2.5	0.333	1
response to chemical (GO:0042221)	410	6	2.41	+	2.49	0.0364	1
regulation of phosphorylation (GO:0042325)	69	1	0.41	+	2.46	0.337	1
response to oxygen-containing compound (GO:1901700)	211	3	1.24	+	2.41	0.131	1
cell wall organization or biogenesis (GO:0071554)	141	2	0.83	+	2.41	0.204	1
response to abscisic acid (GO:0009737)	72	1	0.42	+	2.36	0.349	1
response to alcohol (GO:0097305)	72	1	0.42	+	2.36	0.349	1
steroid metabolic process (GO:0008202)	72	1	0.42	+	2.36	0.349	1
double-strand break repair via homologous recombination (GO:0000724)	72	1	0.42	+	2.36	0.349	1
chromosome segregation (GO:0007059)	72	1	0.42	+	2.36	0.349	1
isoprenoid biosynthetic process (GO:0008299)	76	1	0.45	+	2.23	0.364	1
recombinational repair (GO:0000725)	76	1	0.45	+	2.23	0.364	1
hormone-mediated signaling pathway (GO:0009755)	78	1	0.46	+	2.18	0.371	1
regulation of cell cycle process (GO:0010564)	78	1	0.46	+	2.18	0.371	1
cellular response to hormone stimulus (GO:0032870)	78	1	0.46	+	2.18	0.371	1
response to nitrogen compound (GO:1901698)	79	1	0.47	+	2.15	0.375	1
cellular response to endogenous stimulus (GO:0071495)	80	1	0.47	+	2.12	0.379	1
organic hydroxy compound biosynthetic process (GO:1901617)	83	1	0.49	+	2.05	0.39	1
nuclear division (GO:0000280)	85	1	0.5	+	2	0.397	1
plant-type cell wall organization or biogenesis (GO:0071669)	87	1	0.51	+	1.95	0.404	1
plant-type cell wall biogenesis (GO:0009832)	87	1	0.51	+	1.95	0.404	1
endoplasmic reticulum to Golgi vesicle-mediated transport (GO:0006888)	90	1	0.53	+	1.89	0.414	1
supramolecular fiber organization (GO:0097435)	91	1	0.54	+	1.87	0.418	1
peptidyl-serine phosphorylation (GO:0018105)	98	1	0.58	+	1.73	0.441	1
regulation of RNA biosynthetic process (GO:2001141)	982	10	5.78	+	1.73	0.0869	1
regulation of transcription, DNA-templated (GO:0006355)	982	10	5.78	+	1.73	0.0869	1
regulation of nucleic acid-templated transcription (GO:1903506)	982	10	5.78	+	1.73	0.0869	1
cellular response to chemical stimulus (GO:0070887)	197	2	1.16	+	1.72	0.325	1
alpha-amino acid biosynthetic process (GO:1901607)	99	1	0.58	+	1.72	0.445	1
vesicle organization (GO:0016050)	99	1	0.58	+	1.72	0.445	1
peptidyl-serine modification (GO:0018209)	99	1	0.58	+	1.72	0.445	1
regulation of organelle organization (GO:0033043)	100	1	0.59	+	1.7	0.448	1
isoprenoid metabolic process (GO:0006720)	101	1	0.59	+	1.68	0.451	1
metal ion transport (GO:0030001)	103	1	0.61	+	1.65	0.457	1
positive regulation of transcription, DNA-templated (GO:0045893)	207	2	1.22	+	1.64	0.346	1
positive regulation of RNA biosynthetic process (GO:1902680)	207	2	1.22	+	1.64	0.346	1
positive regulation of nucleic acid-templated transcription (GO:1903508)	207	2	1.22	+	1.64	0.346	1
regulation of RNA metabolic process (GO:0051252)	1042	10	6.14	+	1.63	0.144	1
nuclear transport (GO:0051169)	105	1	0.62	+	1.62	0.464	1
response to abiotic stimulus (GO:0009628)	210	2	1.24	+	1.62	0.353	1
double-strand break repair (GO:0006302)	105	1	0.62	+	1.62	0.464	1
nucleocytoplasmic transport (GO:0006913)	105	1	0.62	+	1.62	0.464	1
regulation of transcription by RNA polymerase II (GO:0006357)	529	5	3.11	+	1.61	0.247	1
cation homeostasis (GO:0055080)	106	1	0.62	+	1.6	0.467	1
protein import (GO:0017038)	107	1	0.63	+	1.59	0.47	1
mitochondrion organization (GO:0007005)	107	1	0.63	+	1.59	0.47	1
regulation of nucleobase-containing compound metabolic process (GO:0019219)	1077	10	6.34	+	1.58	0.152	1
cell wall biogenesis (GO:0042546)	108	1	0.64	+	1.57	0.473	1
cellular amino acid biosynthetic process (GO:0008652)	109	1	0.64	+	1.56	0.476	1
regulation of cellular macromolecule biosynthetic process (GO:2000112)	1093	10	6.44	+	1.55	0.157	1
regulation of macromolecule biosynthetic process (GO:0010556)	1096	10	6.45	+	1.55	0.157	1
regulation of cellular biosynthetic process (GO:0031326)	1109	10	6.53	+	1.53	0.162	1
regulation of biosynthetic process (GO:0009889)	1112	10	6.55	+	1.53	0.163	1
DNA repair (GO:0006281)	223	2	1.31	+	1.52	0.38	1
inorganic ion homeostasis (GO:0098771)	113	1	0.67	+	1.5	0.488	1
developmental process (GO:0032502)	228	2	1.34	+	1.49	0.39	1
positive regulation of cellular biosynthetic process (GO:0031328)	231	2	1.36	+	1.47	0.396	1
positive regulation of macromolecule biosynthetic process (GO:0010557)	231	2	1.36	+	1.47	0.396	1
positive regulation of biosynthetic process (GO:0009891)	231	2	1.36	+	1.47	0.396	1
organelle localization (GO:0051640)	118	1	0.69	+	1.44	0.503	1
methylation (GO:0032259)	118	1	0.69	+	1.44	0.503	1
regulation of phosphorus metabolic process (GO:0051174)	119	1	0.7	+	1.43	0.506	1
cellular response to DNA damage stimulus (GO:0006974)	238	2	1.4	+	1.43	0.654	1
regulation of phosphate metabolic process (GO:0019220)	119	1	0.7	+	1.43	0.506	1
ion homeostasis (GO:0050801)	119	1	0.7	+	1.43	0.506	1
positive regulation of RNA metabolic process (GO:0051254)	241	2	1.42	+	1.41	0.656	1
regulation of gene expression (GO:0010468)	1244	10	7.32	+	1.37	0.34	1
ion transport (GO:0006811)	249	2	1.47	+	1.36	0.661	1
positive regulation of nucleobase-containing compound metabolic process (GO:0045935)	249	2	1.47	+	1.36	0.661	1
amine metabolic process (GO:0009308)	126	1	0.74	+	1.35	0.526	1
carbohydrate derivative metabolic process (GO:1901135)	378	3	2.23	+	1.35	0.491	1
response to stimulus (GO:0050896)	1276	10	7.51	+	1.33	0.348	1
vesicle-mediated transport (GO:0016192)	388	3	2.28	+	1.31	0.501	1
regulation of nitrogen compound metabolic process (GO:0051171)	1299	10	7.65	+	1.31	0.354	1
lipid biosynthetic process (GO:0008610)	262	2	1.54	+	1.3	0.669	1
regulation of primary metabolic process (GO:0080090)	1311	10	7.72	+	1.3	0.358	1
regulation of cell cycle (GO:0051726)	132	1	0.78	+	1.29	0.543	1
regulation of protein modification process (GO:0031399)	132	1	0.78	+	1.29	0.543	1
regulation of cellular metabolic process (GO:0031323)	1323	10	7.79	+	1.28	0.362	1
cellular response to organic substance (GO:0071310)	136	1	0.8	+	1.25	0.553	1
regulation of cellular component organization (GO:0051128)	137	1	0.81	+	1.24	0.556	1
regulation of cellular process (GO:0050794)	1835	13	10.8	+	1.2	0.435	1
reproductive process (GO:0022414)	142	1	0.84	+	1.2	0.569	1
DNA metabolic process (GO:0006259)	286	2	1.68	+	1.19	0.687	1
reproduction (GO:0000003)	144	1	0.85	+	1.18	0.574	1
organelle organization (GO:0006996)	1016	7	5.98	+	1.17	0.674	1
regulation of macromolecule metabolic process (GO:0060255)	1457	10	8.58	+	1.17	0.597	1
regulation of metabolic process (GO:0019222)	1488	10	8.76	+	1.14	0.603	1
alpha-amino acid metabolic process (GO:1901605)	152	1	0.89	+	1.12	0.594	1
Golgi vesicle transport (GO:0048193)	154	1	0.91	+	1.1	0.598	1
regulation of biological process (GO:0050789)	2047	13	12.05	+	1.08	0.765	1
protein phosphorylation (GO:0006468)	315	2	1.85	+	1.08	0.71	1
cellular response to stimulus (GO:0051716)	799	5	4.7	+	1.06	0.813	1
mRNA splicing, via spliceosome (GO:0000398)	160	1	0.94	+	1.06	0.612	1
RNA splicing, via transesterification reactions with bulged adenosine as nucleophile (GO:0000377)	160	1	0.94	+	1.06	0.612	1
RNA splicing, via transesterification reactions (GO:0000375)	160	1	0.94	+	1.06	0.612	1
cellular component organization (GO:0016043)	1296	8	7.63	+	1.05	0.852	1
positive regulation of cellular metabolic process (GO:0031325)	327	2	1.93	+	1.04	0.719	1
cytoskeleton organization (GO:0007010)	165	1	0.97	+	1.03	0.624	1
transport (GO:0006810)	1161	7	6.84	+	1.02	0.845	1
positive regulation of nitrogen compound metabolic process (GO:0051173)	333	2	1.96	+	1.02	0.724	1
Unclassified (UNCLASSIFIED)	26486	159	155.95	+	1.02	0.679	1
anatomical structure development (GO:0048856)	168	1	0.99	+	1.01	0.63	1
positive regulation of macromolecule metabolic process (GO:0010604)	337	2	1.98	+	1.01	0.727	1
establishment of localization (GO:0051234)	1188	7	6.99	+	1	1	1
positive regulation of metabolic process (GO:0009893)	341	2	2.01	-	1	1	1
biological regulation (GO:0065007)	2403	14	14.15	-	0.99	1	1
chemical homeostasis (GO:0048878)	173	1	1.02	-	0.98	1	1
carboxylic acid biosynthetic process (GO:0046394)	174	1	1.02	-	0.98	1	1
RNA splicing (GO:0008380)	175	1	1.03	-	0.97	1	1
cellular component organization or biogenesis (GO:0071840)	1581	9	9.31	-	0.97	1	1
membrane organization (GO:0061024)	177	1	1.04	-	0.96	1	1
organic hydroxy compound metabolic process (GO:1901615)	181	1	1.07	-	0.94	1	1
biological_process (GO:0008150)	8161	45	48.05	-	0.94	0.679	1
positive regulation of cellular process (GO:0048522)	364	2	2.14	-	0.93	1	1
homeostatic process (GO:0042592)	186	1	1.1	-	0.91	1	1
signaling (GO:0023052)	372	2	2.19	-	0.91	1	1
signal transduction (GO:0007165)	372	2	2.19	-	0.91	1	1
localization (GO:0051179)	1305	7	7.68	-	0.91	1	1
positive regulation of biological process (GO:0048518)	383	2	2.26	-	0.89	1	1
phosphorylation (GO:0016310)	391	2	2.3	-	0.87	1	1
establishment of protein localization to organelle (GO:0072594)	196	1	1.15	-	0.87	1	1
cation transport (GO:0006812)	197	1	1.16	-	0.86	1	1
cell communication (GO:0007154)	400	2	2.36	-	0.85	1	1
organic acid biosynthetic process (GO:0016053)	203	1	1.2	-	0.84	1	1
mRNA processing (GO:0006397)	212	1	1.25	-	0.8	1	1
cellular response to stress (GO:0033554)	438	2	2.58	-	0.78	1	1
response to stress (GO:0006950)	671	3	3.95	-	0.76	1	1
carbohydrate derivative biosynthetic process (GO:1901137)	229	1	1.35	-	0.74	1	1
protein localization to organelle (GO:0033365)	231	1	1.36	-	0.74	1	1
nitrogen compound transport (GO:0071705)	487	2	2.87	-	0.7	1	1
lipid metabolic process (GO:0006629)	507	2	2.99	-	0.67	1	1
peptidyl-amino acid modification (GO:0018193)	254	1	1.5	-	0.67	1	1
protein ubiquitination (GO:0016567)	256	1	1.51	-	0.66	1	1
cellular amino acid metabolic process (GO:0006520)	259	1	1.52	-	0.66	1	1
cell cycle process (GO:0022402)	260	1	1.53	-	0.65	1	1
organic substance biosynthetic process (GO:1901576)	1304	5	7.68	-	0.65	0.457	1
regulation of cellular protein metabolic process (GO:0032268)	266	1	1.57	-	0.64	1	1
intracellular transport (GO:0046907)	534	2	3.14	-	0.64	0.774	1
organic substance transport (GO:0071702)	547	2	3.22	-	0.62	0.775	1
phosphorus metabolic process (GO:0006793)	827	3	4.87	-	0.62	0.64	1
cell cycle (GO:0007049)	276	1	1.63	-	0.62	1	1
nucleobase-containing small molecule metabolic process (GO:0055086)	277	1	1.63	-	0.61	1	1
establishment of localization in cell (GO:0051649)	557	2	3.28	-	0.61	0.776	1
regulation of protein metabolic process (GO:0051246)	280	1	1.65	-	0.61	1	1
biosynthetic process (GO:0009058)	1406	5	8.28	-	0.6	0.369	1
metabolic process (GO:0008152)	4548	16	26.78	-	0.6	0.028	1
negative regulation of cellular process (GO:0048523)	288	1	1.7	-	0.59	1	1
small molecule biosynthetic process (GO:0044283)	290	1	1.71	-	0.59	1	1
protein modification by small protein conjugation (GO:0032446)	295	1	1.74	-	0.58	1	1
organic substance metabolic process (GO:0071704)	4194	14	24.69	-	0.57	0.0229	1
mRNA metabolic process (GO:0016071)	307	1	1.81	-	0.55	1	1
nitrogen compound metabolic process (GO:0006807)	3394	11	19.98	-	0.55	0.0327	1
macromolecule biosynthetic process (GO:0009059)	621	2	3.66	-	0.55	0.593	1
cellular process (GO:0009987)	6252	20	36.81	-	0.54	0.00176	1
macromolecule metabolic process (GO:0043170)	2899	9	17.07	-	0.53	0.0413	1
organic cyclic compound metabolic process (GO:1901360)	1651	5	9.72	-	0.51	0.137	1
organonitrogen compound metabolic process (GO:1901564)	2358	7	13.88	-	0.5	0.0673	1
cellular localization (GO:0051641)	678	2	3.99	-	0.5	0.447	1
cellular protein modification process (GO:0006464)	1032	3	6.08	-	0.49	0.296	1
protein modification process (GO:0036211)	1032	3	6.08	-	0.49	0.296	1
intracellular protein transport (GO:0006886)	350	1	2.06	-	0.49	0.727	1
nucleobase-containing compound metabolic process (GO:0006139)	1413	4	8.32	-	0.48	0.153	1
organonitrogen compound biosynthetic process (GO:1901566)	719	2	4.23	-	0.47	0.452	1
negative regulation of biological process (GO:0048519)	367	1	2.16	-	0.46	0.729	1
protein modification by small protein conjugation or removal (GO:0070647)	368	1	2.17	-	0.46	0.729	1
protein transport (GO:0015031)	379	1	2.23	-	0.45	0.731	1
nucleic acid metabolic process (GO:0090304)	1137	3	6.69	-	0.45	0.169	1
heterocycle metabolic process (GO:0046483)	1530	4	9.01	-	0.44	0.119	1
establishment of protein localization (GO:0045184)	385	1	2.27	-	0.44	0.732	1
primary metabolic process (GO:0044238)	3879	10	22.84	-	0.44	0.00248	1
cellular lipid metabolic process (GO:0044255)	388	1	2.28	-	0.44	0.732	1
cellular component biogenesis (GO:0044085)	788	2	4.64	-	0.43	0.339	1
regulation of biological quality (GO:0065008)	396	1	2.33	-	0.43	0.734	1
cellular aromatic compound metabolic process (GO:0006725)	1589	4	9.36	-	0.43	0.0894	1
phosphate-containing compound metabolic process (GO:0006796)	800	2	4.71	-	0.42	0.341	1
organic cyclic compound biosynthetic process (GO:1901362)	411	1	2.42	-	0.41	0.737	1
macromolecule modification (GO:0043412)	1250	3	7.36	-	0.41	0.128	1
cellular metabolic process (GO:0044237)	4231	10	24.91	-	0.4	0.000766	1
cellular protein localization (GO:0034613)	432	1	2.54	-	0.39	0.526	1
cellular macromolecule metabolic process (GO:0044260)	2185	5	12.87	-	0.39	0.0196	1
cellular macromolecule localization (GO:0070727)	439	1	2.58	-	0.39	0.527	1
small molecule metabolic process (GO:0044281)	894	2	5.26	-	0.38	0.184	1
cellular nitrogen compound metabolic process (GO:0034641)	1811	4	10.66	-	0.38	0.0377	1
catabolic process (GO:0009056)	949	2	5.59	-	0.36	0.189	1
protein localization (GO:0008104)	475	1	2.8	-	0.36	0.535	1
cellular component assembly (GO:0022607)	476	1	2.8	-	0.36	0.535	1
carboxylic acid metabolic process (GO:0019752)	480	1	2.83	-	0.35	0.537	1
oxoacid metabolic process (GO:0043436)	484	1	2.85	-	0.35	0.538	1
organic acid metabolic process (GO:0006082)	516	1	3.04	-	0.33	0.38	1
cellular protein metabolic process (GO:0044267)	1595	3	9.39	-	0.32	0.0278	1
protein metabolic process (GO:0019538)	1674	3	9.86	-	0.3	0.0203	1
organonitrogen compound catabolic process (GO:1901565)	566	1	3.33	-	0.3	0.27	1
macromolecule localization (GO:0033036)	567	1	3.34	-	0.3	0.27	1
macromolecule catabolic process (GO:0009057)	573	1	3.37	-	0.3	0.271	1
RNA processing (GO:0006396)	596	1	3.51	-	0.28	0.273	1
cellular biosynthetic process (GO:0044249)	1317	2	7.75	-	0.26	0.0267	1
cellular catabolic process (GO:0044248)	834	1	4.91	-	0.2	0.1	1
RNA metabolic process (GO:0016070)	867	1	5.1	-	0.2	0.0684	1
organic substance catabolic process (GO:1901575)	886	1	5.22	-	0.19	0.0694	1
gene expression (GO:0010467)	1016	1	5.98	-	0.17	0.0339	1
SOM8 module 2
Analysis Type:	PANTHER Overrepresentation Test (Released 20210224)
Annotation Version and Release Date:	GO Ontology database DOI: 10.5281/zenodo.5080993 Released 2021-07-02
Analyzed List:	SOM8 module 2
Reference List:	Solanum lycopersicum (all genes in database)
Test Type:	FISHER
Correction:	FDR
GO biological process complete	background frequency (Total: 34647)	sample frequency (Total: 205)	expected value	over/underrepresentation	fold enrichment	raw P-value	FDR
guanine transport (GO:0015854)	2	1	0.01	+	84.5	0.0175	1
adenine transport (GO:0015853)	2	1	0.01	+	84.5	0.0175	1
purine nucleobase transport (GO:0006863)	2	1	0.01	+	84.5	0.0175	1
S-methylmethionine cycle (GO:0033528)	2	1	0.01	+	84.5	0.0175	1
S-methylmethionine metabolic process (GO:0033477)	2	1	0.01	+	84.5	0.0175	1
nucleobase transport (GO:0015851)	3	1	0.02	+	56.34	0.0233	1
L-ornithine transmembrane transport (GO:1903352)	4	1	0.02	+	42.25	0.0291	1
ornithine transport (GO:0015822)	4	1	0.02	+	42.25	0.0291	1
mitochondrial L-ornithine transmembrane transport (GO:1990575)	4	1	0.02	+	42.25	0.0291	1
L-alpha-amino acid transmembrane transport (GO:1902475)	4	1	0.02	+	42.25	0.0291	1
indolalkylamine catabolic process (GO:0046218)	5	1	0.03	+	33.8	0.0348	1
indole-containing compound catabolic process (GO:0042436)	5	1	0.03	+	33.8	0.0348	1
tryptophan catabolic process to kynurenine (GO:0019441)	5	1	0.03	+	33.8	0.0348	1
kynurenine metabolic process (GO:0070189)	5	1	0.03	+	33.8	0.0348	1
tryptophan catabolic process (GO:0006569)	5	1	0.03	+	33.8	0.0348	1
response to wounding (GO:0009611)	16	3	0.09	+	31.69	0.000181	0.633
L-amino acid transport (GO:0015807)	6	1	0.04	+	28.17	0.0405	1
response to chitin (GO:0010200)	6	1	0.04	+	28.17	0.0405	1
phosphate ion transmembrane transport (GO:0035435)	6	1	0.04	+	28.17	0.0405	1
regulation of jasmonic acid mediated signaling pathway (GO:2000022)	19	3	0.11	+	26.69	0.000284	0.497
response to fungus (GO:0009620)	21	3	0.12	+	24.14	0.000371	0.432
regulation of defense response (GO:0031347)	21	3	0.12	+	24.14	0.000371	0.324
defense response to fungus (GO:0050832)	21	3	0.12	+	24.14	0.000371	0.259
carbohydrate phosphorylation (GO:0046835)	7	1	0.04	+	24.14	0.0461	1
inositol phosphorylation (GO:0052746)	7	1	0.04	+	24.14	0.0461	1
response to jasmonic acid (GO:0009753)	8	1	0.05	+	21.13	0.0517	1
trehalose biosynthetic process (GO:0005992)	8	1	0.05	+	21.13	0.0517	1
trehalose metabolic process (GO:0005991)	8	1	0.05	+	21.13	0.0517	1
methionine biosynthetic process (GO:0009086)	8	1	0.05	+	21.13	0.0517	1
response to fatty acid (GO:0070542)	8	1	0.05	+	21.13	0.0517	1
xyloglucan biosynthetic process (GO:0009969)	9	1	0.05	+	18.78	0.0573	1
inorganic anion transmembrane transport (GO:0098661)	10	1	0.06	+	16.9	0.0628	1
inositol phosphate dephosphorylation (GO:0046855)	10	1	0.06	+	16.9	0.0628	1
inositol phosphate catabolic process (GO:0071545)	10	1	0.06	+	16.9	0.0628	1
methionine metabolic process (GO:0006555)	10	1	0.06	+	16.9	0.0628	1
glutamate catabolic process (GO:0006538)	11	1	0.07	+	15.36	0.0684	1
cellular biogenic amine catabolic process (GO:0042402)	11	1	0.07	+	15.36	0.0684	1
amine catabolic process (GO:0009310)	11	1	0.07	+	15.36	0.0684	1
dicarboxylic acid catabolic process (GO:0043649)	12	1	0.07	+	14.08	0.0738	1
phosphate ion transport (GO:0006817)	12	1	0.07	+	14.08	0.0738	1
negative regulation of molecular function (GO:0044092)	38	3	0.22	+	13.34	0.00181	0.792
negative regulation of catalytic activity (GO:0043086)	38	3	0.22	+	13.34	0.00181	0.704
phosphorylated carbohydrate dephosphorylation (GO:0046838)	13	1	0.08	+	13	0.0793	1
aromatic amino acid family catabolic process (GO:0009074)	13	1	0.08	+	13	0.0793	1
regulation of response to stress (GO:0080134)	41	3	0.24	+	12.37	0.00222	0.777
anion transmembrane transport (GO:0098656)	29	2	0.17	+	11.66	0.0143	1
glutamine family amino acid catabolic process (GO:0009065)	15	1	0.09	+	11.27	0.0901	1
xyloglucan metabolic process (GO:0010411)	15	1	0.09	+	11.27	0.0901	1
disaccharide biosynthetic process (GO:0046351)	15	1	0.09	+	11.27	0.0901	1
inositol phosphate metabolic process (GO:0043647)	16	1	0.09	+	10.56	0.0954	1
amino acid transmembrane transport (GO:0003333)	16	1	0.09	+	10.56	0.0954	1
establishment of plastid localization (GO:0051667)	17	1	0.1	+	9.94	0.101	1
plastid localization (GO:0051644)	17	1	0.1	+	9.94	0.101	1
chloroplast localization (GO:0019750)	17	1	0.1	+	9.94	0.101	1
regulation of signal transduction (GO:0009966)	51	3	0.3	+	9.94	0.00399	1
chloroplast accumulation movement (GO:0009904)	17	1	0.1	+	9.94	0.101	1
chloroplast avoidance movement (GO:0009903)	17	1	0.1	+	9.94	0.101	1
chloroplast relocation (GO:0009902)	17	1	0.1	+	9.94	0.101	1
regulation of cell communication (GO:0010646)	52	3	0.31	+	9.75	0.0042	1
regulation of signaling (GO:0023051)	52	3	0.31	+	9.75	0.0042	0.979
carboxylic acid transport (GO:0046942)	18	1	0.11	+	9.39	0.106	1
benzene-containing compound metabolic process (GO:0042537)	36	2	0.21	+	9.39	0.0211	1
glutamate metabolic process (GO:0006536)	19	1	0.11	+	8.9	0.111	1
aspartate family amino acid biosynthetic process (GO:0009067)	19	1	0.11	+	8.9	0.111	1
oligosaccharide biosynthetic process (GO:0009312)	19	1	0.11	+	8.9	0.111	1
polyol catabolic process (GO:0046174)	20	1	0.12	+	8.45	0.117	1
response to salt stress (GO:0009651)	20	1	0.12	+	8.45	0.117	1
defense response to other organism (GO:0098542)	61	3	0.36	+	8.31	0.00642	1
response to other organism (GO:0051707)	61	3	0.36	+	8.31	0.00642	1
response to biotic stimulus (GO:0009607)	61	3	0.36	+	8.31	0.00642	1
immune response (GO:0006955)	61	3	0.36	+	8.31	0.00642	1
response to external biotic stimulus (GO:0043207)	61	3	0.36	+	8.31	0.00642	1
immune system process (GO:0002376)	61	3	0.36	+	8.31	0.00642	1
alcohol catabolic process (GO:0046164)	21	1	0.12	+	8.05	0.122	1
response to osmotic stress (GO:0006970)	21	1	0.12	+	8.05	0.122	1
sulfur amino acid biosynthetic process (GO:0000097)	21	1	0.12	+	8.05	0.122	1
biological process involved in interspecies interaction between organisms (GO:0044419)	64	3	0.38	+	7.92	0.00729	1
fatty acid oxidation (GO:0019395)	22	1	0.13	+	7.68	0.127	1
inositol metabolic process (GO:0006020)	22	1	0.13	+	7.68	0.127	1
fatty acid beta-oxidation (GO:0006635)	22	1	0.13	+	7.68	0.127	1
indole-containing compound metabolic process (GO:0042430)	23	1	0.14	+	7.35	0.132	1
alpha-amino acid catabolic process (GO:1901606)	46	2	0.27	+	7.35	0.0325	1
indolalkylamine metabolic process (GO:0006586)	23	1	0.14	+	7.35	0.132	1
tryptophan metabolic process (GO:0006568)	23	1	0.14	+	7.35	0.132	1
phosphatidylinositol dephosphorylation (GO:0046856)	24	1	0.14	+	7.04	0.137	1
fatty acid catabolic process (GO:0009062)	24	1	0.14	+	7.04	0.137	1
organic hydroxy compound catabolic process (GO:1901616)	24	1	0.14	+	7.04	0.137	1
diterpenoid biosynthetic process (GO:0016102)	24	1	0.14	+	7.04	0.137	1
polyol metabolic process (GO:0019751)	49	2	0.29	+	6.9	0.0364	1
response to auxin (GO:0009733)	52	2	0.31	+	6.5	0.0403	1
phospholipid dephosphorylation (GO:0046839)	26	1	0.15	+	6.5	0.147	1
disaccharide metabolic process (GO:0005984)	26	1	0.15	+	6.5	0.147	1
regulation of response to stimulus (GO:0048583)	79	3	0.47	+	6.42	0.0126	1
organic anion transport (GO:0015711)	27	1	0.16	+	6.26	0.152	1
salicylic acid metabolic process (GO:0009696)	27	1	0.16	+	6.26	0.152	1
organic acid transmembrane transport (GO:1903825)	27	1	0.16	+	6.26	0.152	1
carboxylic acid transmembrane transport (GO:1905039)	27	1	0.16	+	6.26	0.152	1
carbohydrate transport (GO:0008643)	28	1	0.17	+	6.04	0.157	1
intra-Golgi vesicle-mediated transport (GO:0006891)	28	1	0.17	+	6.04	0.157	1
sulfur amino acid metabolic process (GO:0000096)	28	1	0.17	+	6.04	0.157	1
phenol-containing compound metabolic process (GO:0018958)	29	1	0.17	+	5.83	0.162	1
defense response (GO:0006952)	87	3	0.51	+	5.83	0.0162	1
retrograde vesicle-mediated transport, Golgi to endoplasmic reticulum (GO:0006890)	29	1	0.17	+	5.83	0.162	1
inorganic anion transport (GO:0015698)	30	1	0.18	+	5.63	0.167	1
anion transport (GO:0006820)	60	2	0.36	+	5.63	0.0517	1
oligosaccharide metabolic process (GO:0009311)	30	1	0.18	+	5.63	0.167	1
aspartate family amino acid metabolic process (GO:0009066)	31	1	0.18	+	5.45	0.172	1
monocarboxylic acid catabolic process (GO:0072329)	32	1	0.19	+	5.28	0.177	1
jasmonic acid metabolic process (GO:0009694)	33	1	0.2	+	5.12	0.182	1
diterpenoid metabolic process (GO:0016101)	33	1	0.2	+	5.12	0.182	1
glucan biosynthetic process (GO:0009250)	33	1	0.2	+	5.12	0.182	1
cellular modified amino acid metabolic process (GO:0006575)	67	2	0.4	+	5.05	0.0625	1
amino acid transport (GO:0006865)	34	1	0.2	+	4.97	0.187	1
alcohol metabolic process (GO:0006066)	68	2	0.4	+	4.97	0.0641	1
cellular ketone metabolic process (GO:0042180)	35	1	0.21	+	4.83	0.191	1
carboxylic acid catabolic process (GO:0046395)	107	3	0.63	+	4.74	0.0273	1
lipid modification (GO:0030258)	75	2	0.44	+	4.51	0.0756	1
cellular amino acid catabolic process (GO:0009063)	76	2	0.45	+	4.45	0.0773	1
response to external stimulus (GO:0009605)	116	3	0.69	+	4.37	0.0334	1
organic acid catabolic process (GO:0016054)	118	3	0.7	+	4.3	0.0348	1
cellular carbohydrate metabolic process (GO:0044262)	159	4	0.94	+	4.25	0.016	1
glutathione metabolic process (GO:0006749)	40	1	0.24	+	4.23	0.215	1
secondary metabolic process (GO:0019748)	41	1	0.24	+	4.12	0.22	1
aromatic amino acid family metabolic process (GO:0009072)	43	1	0.25	+	3.93	0.229	1
glutamine family amino acid metabolic process (GO:0009064)	43	1	0.25	+	3.93	0.229	1
small molecule catabolic process (GO:0044282)	172	4	1.02	+	3.93	0.0205	1
cellular carbohydrate biosynthetic process (GO:0034637)	88	2	0.52	+	3.84	0.0986	1
protein autophosphorylation (GO:0046777)	134	3	0.79	+	3.78	0.0474	1
organic acid transport (GO:0015849)	46	1	0.27	+	3.67	0.242	1
response to cytokinin (GO:0009735)	46	1	0.27	+	3.67	0.242	1
lipid oxidation (GO:0034440)	46	1	0.27	+	3.67	0.242	1
hemicellulose metabolic process (GO:0010410)	48	1	0.28	+	3.52	0.251	1
alpha-amino acid metabolic process (GO:1901605)	152	3	0.9	+	3.34	0.0639	1
terpenoid biosynthetic process (GO:0016114)	51	1	0.3	+	3.31	0.264	1
cellular glucan metabolic process (GO:0006073)	52	1	0.31	+	3.25	0.269	1
carbohydrate biosynthetic process (GO:0016051)	106	2	0.63	+	3.19	0.133	1
cellular biogenic amine metabolic process (GO:0006576)	54	1	0.32	+	3.13	0.277	1
cellular amine metabolic process (GO:0044106)	54	1	0.32	+	3.13	0.277	1
dicarboxylic acid metabolic process (GO:0043648)	55	1	0.33	+	3.07	0.282	1
organophosphate catabolic process (GO:0046434)	57	1	0.34	+	2.97	0.29	1
regulation of catalytic activity (GO:0050790)	172	3	1.02	+	2.95	0.0848	1
cell wall polysaccharide biosynthetic process (GO:0070592)	58	1	0.34	+	2.91	0.294	1
regulation of molecular function (GO:0065009)	175	3	1.04	+	2.9	0.0881	1
sulfur compound biosynthetic process (GO:0044272)	59	1	0.35	+	2.86	0.298	1
mitochondrial transmembrane transport (GO:1990542)	60	1	0.36	+	2.82	0.302	1
organic hydroxy compound metabolic process (GO:1901615)	181	3	1.07	+	2.8	0.095	1
establishment of organelle localization (GO:0051656)	61	1	0.36	+	2.77	0.307	1
cell wall macromolecule biosynthetic process (GO:0044038)	62	1	0.37	+	2.73	0.311	1
cellular component macromolecule biosynthetic process (GO:0070589)	62	1	0.37	+	2.73	0.311	1
glucan metabolic process (GO:0044042)	63	1	0.37	+	2.68	0.315	1
cell wall polysaccharide metabolic process (GO:0010383)	64	1	0.38	+	2.64	0.319	1
response to organonitrogen compound (GO:0010243)	64	1	0.38	+	2.64	0.319	1
phosphatidylinositol metabolic process (GO:0046488)	66	1	0.39	+	2.56	0.327	1
terpenoid metabolic process (GO:0006721)	67	1	0.4	+	2.52	0.331	1
cell wall macromolecule metabolic process (GO:0044036)	68	1	0.4	+	2.49	0.335	1
cellular polysaccharide biosynthetic process (GO:0033692)	68	1	0.4	+	2.49	0.335	1
polysaccharide biosynthetic process (GO:0000271)	68	1	0.4	+	2.49	0.335	1
carbohydrate metabolic process (GO:0005975)	280	4	1.66	+	2.41	0.0875	1
lipid catabolic process (GO:0016042)	71	1	0.42	+	2.38	0.346	1
cellular lipid catabolic process (GO:0044242)	71	1	0.42	+	2.38	0.346	1
response to abscisic acid (GO:0009737)	72	1	0.43	+	2.35	0.35	1
response to alcohol (GO:0097305)	72	1	0.43	+	2.35	0.35	1
isoprenoid biosynthetic process (GO:0008299)	76	1	0.45	+	2.22	0.365	1
fatty acid metabolic process (GO:0006631)	77	1	0.46	+	2.19	0.369	1
glycerophospholipid metabolic process (GO:0006650)	78	1	0.46	+	2.17	0.373	1
response to nitrogen compound (GO:1901698)	79	1	0.47	+	2.14	0.377	1
chloroplast organization (GO:0009658)	79	1	0.47	+	2.14	0.377	1
mitochondrial transport (GO:0006839)	79	1	0.47	+	2.14	0.377	1
ion transmembrane transport (GO:0034220)	164	2	0.97	+	2.06	0.256	1
response to stress (GO:0006950)	671	8	3.97	+	2.02	0.066	1
protein ubiquitination (GO:0016567)	256	3	1.51	+	1.98	0.196	1
cellular amino acid metabolic process (GO:0006520)	259	3	1.53	+	1.96	0.201	1
cellular polysaccharide metabolic process (GO:0044264)	87	1	0.51	+	1.94	0.405	1
dephosphorylation (GO:0016311)	88	1	0.52	+	1.92	0.409	1
endoplasmic reticulum to Golgi vesicle-mediated transport (GO:0006888)	90	1	0.53	+	1.88	0.416	1
plastid organization (GO:0009657)	94	1	0.56	+	1.8	0.429	1
glycerolipid metabolic process (GO:0046486)	96	1	0.57	+	1.76	0.436	1
carboxylic acid metabolic process (GO:0019752)	480	5	2.84	+	1.76	0.215	1
oxoacid metabolic process (GO:0043436)	484	5	2.86	+	1.75	0.217	1
cellular lipid metabolic process (GO:0044255)	388	4	2.3	+	1.74	0.298	1
phosphorylation (GO:0016310)	391	4	2.31	+	1.73	0.3	1
peptidyl-serine phosphorylation (GO:0018105)	98	1	0.58	+	1.72	0.443	1
protein modification by small protein conjugation (GO:0032446)	295	3	1.75	+	1.72	0.256	1
response to hormone (GO:0009725)	198	2	1.17	+	1.71	0.329	1
alpha-amino acid biosynthetic process (GO:1901607)	99	1	0.59	+	1.71	0.446	1
peptidyl-serine modification (GO:0018209)	99	1	0.59	+	1.71	0.446	1
sulfur compound metabolic process (GO:0006790)	199	2	1.18	+	1.7	0.331	1
response to organic substance (GO:0010033)	299	3	1.77	+	1.7	0.263	1
response to endogenous stimulus (GO:0009719)	200	2	1.18	+	1.69	0.333	1
isoprenoid metabolic process (GO:0006720)	101	1	0.6	+	1.67	0.453	1
lipid metabolic process (GO:0006629)	507	5	3	+	1.67	0.233	1
intracellular signal transduction (GO:0035556)	203	2	1.2	+	1.67	0.34	1
organic acid metabolic process (GO:0006082)	516	5	3.05	+	1.64	0.239	1
protein phosphorylation (GO:0006468)	315	3	1.86	+	1.61	0.44	1
response to oxygen-containing compound (GO:1901700)	211	2	1.25	+	1.6	0.357	1
monocarboxylic acid metabolic process (GO:0032787)	212	2	1.25	+	1.59	0.359	1
response to stimulus (GO:0050896)	1276	12	7.55	+	1.59	0.132	1
cell wall biogenesis (GO:0042546)	108	1	0.64	+	1.56	0.475	1
response to lipid (GO:0033993)	108	1	0.64	+	1.56	0.475	1
cellular amino acid biosynthetic process (GO:0008652)	109	1	0.64	+	1.55	0.478	1
polysaccharide metabolic process (GO:0005976)	113	1	0.67	+	1.5	0.49	1
organelle localization (GO:0051640)	118	1	0.7	+	1.43	0.505	1
protein modification by small protein conjugation or removal (GO:0070647)	368	3	2.18	+	1.38	0.484	1
ion transport (GO:0006811)	249	2	1.47	+	1.36	0.662	1
amine metabolic process (GO:0009308)	126	1	0.75	+	1.34	0.528	1
phospholipid metabolic process (GO:0006644)	127	1	0.75	+	1.33	0.531	1
small molecule metabolic process (GO:0044281)	894	7	5.29	+	1.32	0.379	1
response to chemical (GO:0042221)	410	3	2.43	+	1.24	0.525	1
organic substance transport (GO:0071702)	547	4	3.24	+	1.24	0.57	1
cell wall organization or biogenesis (GO:0071554)	141	1	0.83	+	1.2	0.568	1
cation transmembrane transport (GO:0098655)	143	1	0.85	+	1.18	0.573	1
inorganic ion transmembrane transport (GO:0098660)	145	1	0.86	+	1.17	0.578	1
heterocycle catabolic process (GO:0046700)	150	1	0.89	+	1.13	0.59	1
cellular nitrogen compound catabolic process (GO:0044270)	150	1	0.89	+	1.13	0.59	1
aromatic compound catabolic process (GO:0019439)	154	1	0.91	+	1.1	0.6	1
Golgi vesicle transport (GO:0048193)	154	1	0.91	+	1.1	0.6	1
transmembrane transport (GO:0055085)	309	2	1.83	+	1.09	0.706	1
organic cyclic compound catabolic process (GO:1901361)	159	1	0.94	+	1.06	0.612	1
phosphate-containing compound metabolic process (GO:0006796)	800	5	4.73	+	1.06	0.814	1
nitrogen compound transport (GO:0071705)	487	3	2.88	+	1.04	0.766	1
regulation of RNA biosynthetic process (GO:2001141)	982	6	5.81	+	1.03	0.833	1
regulation of transcription, DNA-templated (GO:0006355)	982	6	5.81	+	1.03	0.833	1
regulation of nucleic acid-templated transcription (GO:1903506)	982	6	5.81	+	1.03	0.833	1
phosphorus metabolic process (GO:0006793)	827	5	4.89	+	1.02	0.819	1
Unclassified (UNCLASSIFIED)	26486	160	156.71	+	1.02	0.621	1
regulation of cellular process (GO:0050794)	1835	11	10.86	+	1.01	0.876	1
biological regulation (GO:0065007)	2403	14	14.22	-	0.98	1	1
cellular protein modification process (GO:0006464)	1032	6	6.11	-	0.98	1	1
protein modification process (GO:0036211)	1032	6	6.11	-	0.98	1	1
regulation of RNA metabolic process (GO:0051252)	1042	6	6.17	-	0.97	1	1
carboxylic acid biosynthetic process (GO:0046394)	174	1	1.03	-	0.97	1	1
regulation of transcription by RNA polymerase II (GO:0006357)	529	3	3.13	-	0.96	1	1
organic substance catabolic process (GO:1901575)	886	5	5.24	-	0.95	1	1
regulation of nucleobase-containing compound metabolic process (GO:0019219)	1077	6	6.37	-	0.94	1	1
biological_process (GO:0008150)	8161	45	48.29	-	0.93	0.621	1
regulation of cellular macromolecule biosynthetic process (GO:2000112)	1093	6	6.47	-	0.93	1	1
regulation of macromolecule biosynthetic process (GO:0010556)	1096	6	6.48	-	0.93	1	1
regulation of cellular biosynthetic process (GO:0031326)	1109	6	6.56	-	0.91	1	1
regulation of biosynthetic process (GO:0009889)	1112	6	6.58	-	0.91	1	1
signaling (GO:0023052)	372	2	2.2	-	0.91	1	1
signal transduction (GO:0007165)	372	2	2.2	-	0.91	1	1
regulation of biological process (GO:0050789)	2047	11	12.11	-	0.91	0.882	1
organonitrogen compound catabolic process (GO:1901565)	566	3	3.35	-	0.9	1	1
catabolic process (GO:0009056)	949	5	5.62	-	0.89	1	1
cation transport (GO:0006812)	197	1	1.17	-	0.86	1	1
establishment of localization (GO:0051234)	1188	6	7.03	-	0.85	0.848	1
cell communication (GO:0007154)	400	2	2.37	-	0.85	1	1
organic acid biosynthetic process (GO:0016053)	203	1	1.2	-	0.83	1	1
positive regulation of transcription, DNA-templated (GO:0045893)	207	1	1.22	-	0.82	1	1
positive regulation of RNA biosynthetic process (GO:1902680)	207	1	1.22	-	0.82	1	1
positive regulation of nucleic acid-templated transcription (GO:1903508)	207	1	1.22	-	0.82	1	1
regulation of gene expression (GO:0010468)	1244	6	7.36	-	0.82	0.849	1
macromolecule modification (GO:0043412)	1250	6	7.4	-	0.81	0.85	1
cellular catabolic process (GO:0044248)	834	4	4.93	-	0.81	1	1
response to abiotic stimulus (GO:0009628)	210	1	1.24	-	0.8	1	1
organonitrogen compound metabolic process (GO:1901564)	2358	11	13.95	-	0.79	0.488	1
primary metabolic process (GO:0044238)	3879	18	22.95	-	0.78	0.317	1
regulation of nitrogen compound metabolic process (GO:0051171)	1299	6	7.69	-	0.78	0.711	1
localization (GO:0051179)	1305	6	7.72	-	0.78	0.711	1
regulation of primary metabolic process (GO:0080090)	1311	6	7.76	-	0.77	0.712	1
regulation of cellular metabolic process (GO:0031323)	1323	6	7.83	-	0.77	0.712	1
organic substance metabolic process (GO:0071704)	4194	19	24.82	-	0.77	0.238	1
cellular metabolic process (GO:0044237)	4231	19	25.03	-	0.76	0.238	1
metabolic process (GO:0008152)	4548	20	26.91	-	0.74	0.177	1
cellular protein metabolic process (GO:0044267)	1595	7	9.44	-	0.74	0.505	1
positive regulation of cellular biosynthetic process (GO:0031328)	231	1	1.37	-	0.73	1	1
positive regulation of macromolecule biosynthetic process (GO:0010557)	231	1	1.37	-	0.73	1	1
positive regulation of biosynthetic process (GO:0009891)	231	1	1.37	-	0.73	1	1
transport (GO:0006810)	1161	5	6.87	-	0.73	0.694	1
protein metabolic process (GO:0019538)	1674	7	9.9	-	0.71	0.416	1
positive regulation of RNA metabolic process (GO:0051254)	241	1	1.43	-	0.7	1	1
regulation of macromolecule metabolic process (GO:0060255)	1457	6	8.62	-	0.7	0.483	1
regulation of metabolic process (GO:0019222)	1488	6	8.8	-	0.68	0.486	1
positive regulation of nucleobase-containing compound metabolic process (GO:0045935)	249	1	1.47	-	0.68	1	1
peptidyl-amino acid modification (GO:0018193)	254	1	1.5	-	0.67	1	1
cellular process (GO:0009987)	6252	24	36.99	-	0.65	0.0175	1
lipid biosynthetic process (GO:0008610)	262	1	1.55	-	0.65	1	1
cellular macromolecule metabolic process (GO:0044260)	2185	8	12.93	-	0.62	0.193	1
establishment of localization in cell (GO:0051649)	557	2	3.3	-	0.61	0.777	1
small molecule biosynthetic process (GO:0044283)	290	1	1.72	-	0.58	1	1
peptide metabolic process (GO:0006518)	300	1	1.78	-	0.56	1	1
nitrogen compound metabolic process (GO:0006807)	3394	11	20.08	-	0.55	0.0329	1
organic substance biosynthetic process (GO:1901576)	1304	4	7.72	-	0.52	0.263	1
positive regulation of cellular metabolic process (GO:0031325)	327	1	1.93	-	0.52	1	1
cellular biosynthetic process (GO:0044249)	1317	4	7.79	-	0.51	0.2	1
positive regulation of nitrogen compound metabolic process (GO:0051173)	333	1	1.97	-	0.51	1	1
positive regulation of macromolecule metabolic process (GO:0010604)	337	1	1.99	-	0.5	0.727	1
cellular localization (GO:0051641)	678	2	4.01	-	0.5	0.447	1
positive regulation of metabolic process (GO:0009893)	341	1	2.02	-	0.5	0.727	1
intracellular protein transport (GO:0006886)	350	1	2.07	-	0.48	0.728	1
biosynthetic process (GO:0009058)	1406	4	8.32	-	0.48	0.153	1
macromolecule metabolic process (GO:0043170)	2899	8	17.15	-	0.47	0.0214	1
positive regulation of cellular process (GO:0048522)	364	1	2.15	-	0.46	0.729	1
protein transport (GO:0015031)	379	1	2.24	-	0.45	0.731	1
cellular amide metabolic process (GO:0043603)	381	1	2.25	-	0.44	0.731	1
positive regulation of biological process (GO:0048518)	383	1	2.27	-	0.44	0.732	1
establishment of protein localization (GO:0045184)	385	1	2.28	-	0.44	0.732	1
vesicle-mediated transport (GO:0016192)	388	1	2.3	-	0.44	0.733	1
organophosphate metabolic process (GO:0019637)	391	1	2.31	-	0.43	0.733	1
cellular response to stimulus (GO:0051716)	799	2	4.73	-	0.42	0.342	1
proteolysis involved in cellular protein catabolic process (GO:0051603)	419	1	2.48	-	0.4	0.526	1
cellular protein catabolic process (GO:0044257)	420	1	2.49	-	0.4	0.526	1
protein catabolic process (GO:0030163)	430	1	2.54	-	0.39	0.526	1
cellular protein localization (GO:0034613)	432	1	2.56	-	0.39	0.527	1
cellular macromolecule localization (GO:0070727)	439	1	2.6	-	0.38	0.527	1
protein localization (GO:0008104)	475	1	2.81	-	0.36	0.536	1
cellular macromolecule catabolic process (GO:0044265)	524	1	3.1	-	0.32	0.381	1
intracellular transport (GO:0046907)	534	1	3.16	-	0.32	0.384	1
macromolecule localization (GO:0033036)	567	1	3.35	-	0.3	0.27	1
macromolecule catabolic process (GO:0009057)	573	1	3.39	-	0.29	0.271	1
proteolysis (GO:0006508)	574	1	3.4	-	0.29	0.271	1
cellular macromolecule biosynthetic process (GO:0034645)	606	1	3.59	-	0.28	0.275	1
macromolecule biosynthetic process (GO:0009059)	621	1	3.67	-	0.27	0.279	1
organonitrogen compound biosynthetic process (GO:1901566)	719	1	4.25	-	0.24	0.137	1
cellular component biogenesis (GO:0044085)	788	1	4.66	-	0.21	0.0968	1
cellular component organization or biogenesis (GO:0071840)	1581	2	9.35	-	0.21	0.0101	1
cellular aromatic compound metabolic process (GO:0006725)	1589	2	9.4	-	0.21	0.0068	1
organic cyclic compound metabolic process (GO:1901360)	1651	2	9.77	-	0.2	0.00717	1
cellular nitrogen compound metabolic process (GO:0034641)	1811	2	10.72	-	0.19	0.00237	0.69
organelle organization (GO:0006996)	1016	1	6.01	-	0.17	0.0341	1
cellular component organization (GO:0016043)	1296	1	7.67	-	0.13	0.0081	1
heterocycle metabolic process (GO:0046483)	1530	1	9.05	-	0.11	0.00178	0.886
