# Supplementary material for: Investigating Host and Parasitic Plant Interaction by Tissue-Specific Gene Analyses on Tomato and Cuscuta campestris Interface at Three Haustorial Developmental Stages
Source: Front Plant Sci. 2022 Feb 10;12:764843. doi: 10.3389/fpls.2021.764843 (PMC8866705; doi:10.3389/fpls.2021.764843)
Supplement: Supplementary file 17 [file Table_10.XLSX]

## Sheet: 工作表1
Supplemental Table S10. The sequences that are used in HIGS RNAi constructs for C. campestris candidate genes.
HB7 RNAi	caagcagatggagcacgaattcagagtcctcaaatccgaattcgacagccttaatgcccagtttgatgaactcaaaagagaaaaagagtatttgcttttgcagttggaggaactacgaaaccagctagaaaggagtggaagtgcagggcagagaaagaatcatcaagacacacaaagccgggagaggcctaccgattcagaaaacagaaatgcagggttgggggcgtgtgaaactccaatagtatgcgtaaatggtggaagacgagcaaccaacaatgggtttgttgagcgcgacataaaagaagaaaaagaagaagaagaagaagtggagtttttgaacctggtggagttaggtggcagccctttcgcctcgccggatcactggtgcagtggcagctt…
PMEI RNAi	atgagctaatgtccgacttgtgcaatagtttaaaaccaaccgcgaaagagctcgcggctgccaacacgggcaaccaagaacagttcttgaagcacataggcaacgtgcagacatggcttagcgccgcgataaccgacccagacacttgcctggatgggttagatggagaaacaaaggtggagatggaagaaagagtaagtaaagtgacacaactcactaccgttgcacttgcgttggttaacaagttcggtgagggagttcaaaagaaatt
ERF1 RNAi	tatagagagccggtcgagtgggggttcggccgagttacacgcttggatgttggcggtgggccagcagctgatggtcagcggaatagcggtttgaccatgataggaggcgtgtttggatgggataaatatagacacacatttaatgcaagttgggatttgaactaaattcttacactatcatcttttcttcaggttccaaacaaggatttgtatatatccacggttaagttatcatcttgtataacacacgtatttaggcttgcttttcttagctatc
